# Supplementary material
Source: PubMed Central journal article supplement (PMC9357162)
Supplement: NIHMS1819170-supplement-1.pdf [file NIHMS1819170-supplement-1.pdf]

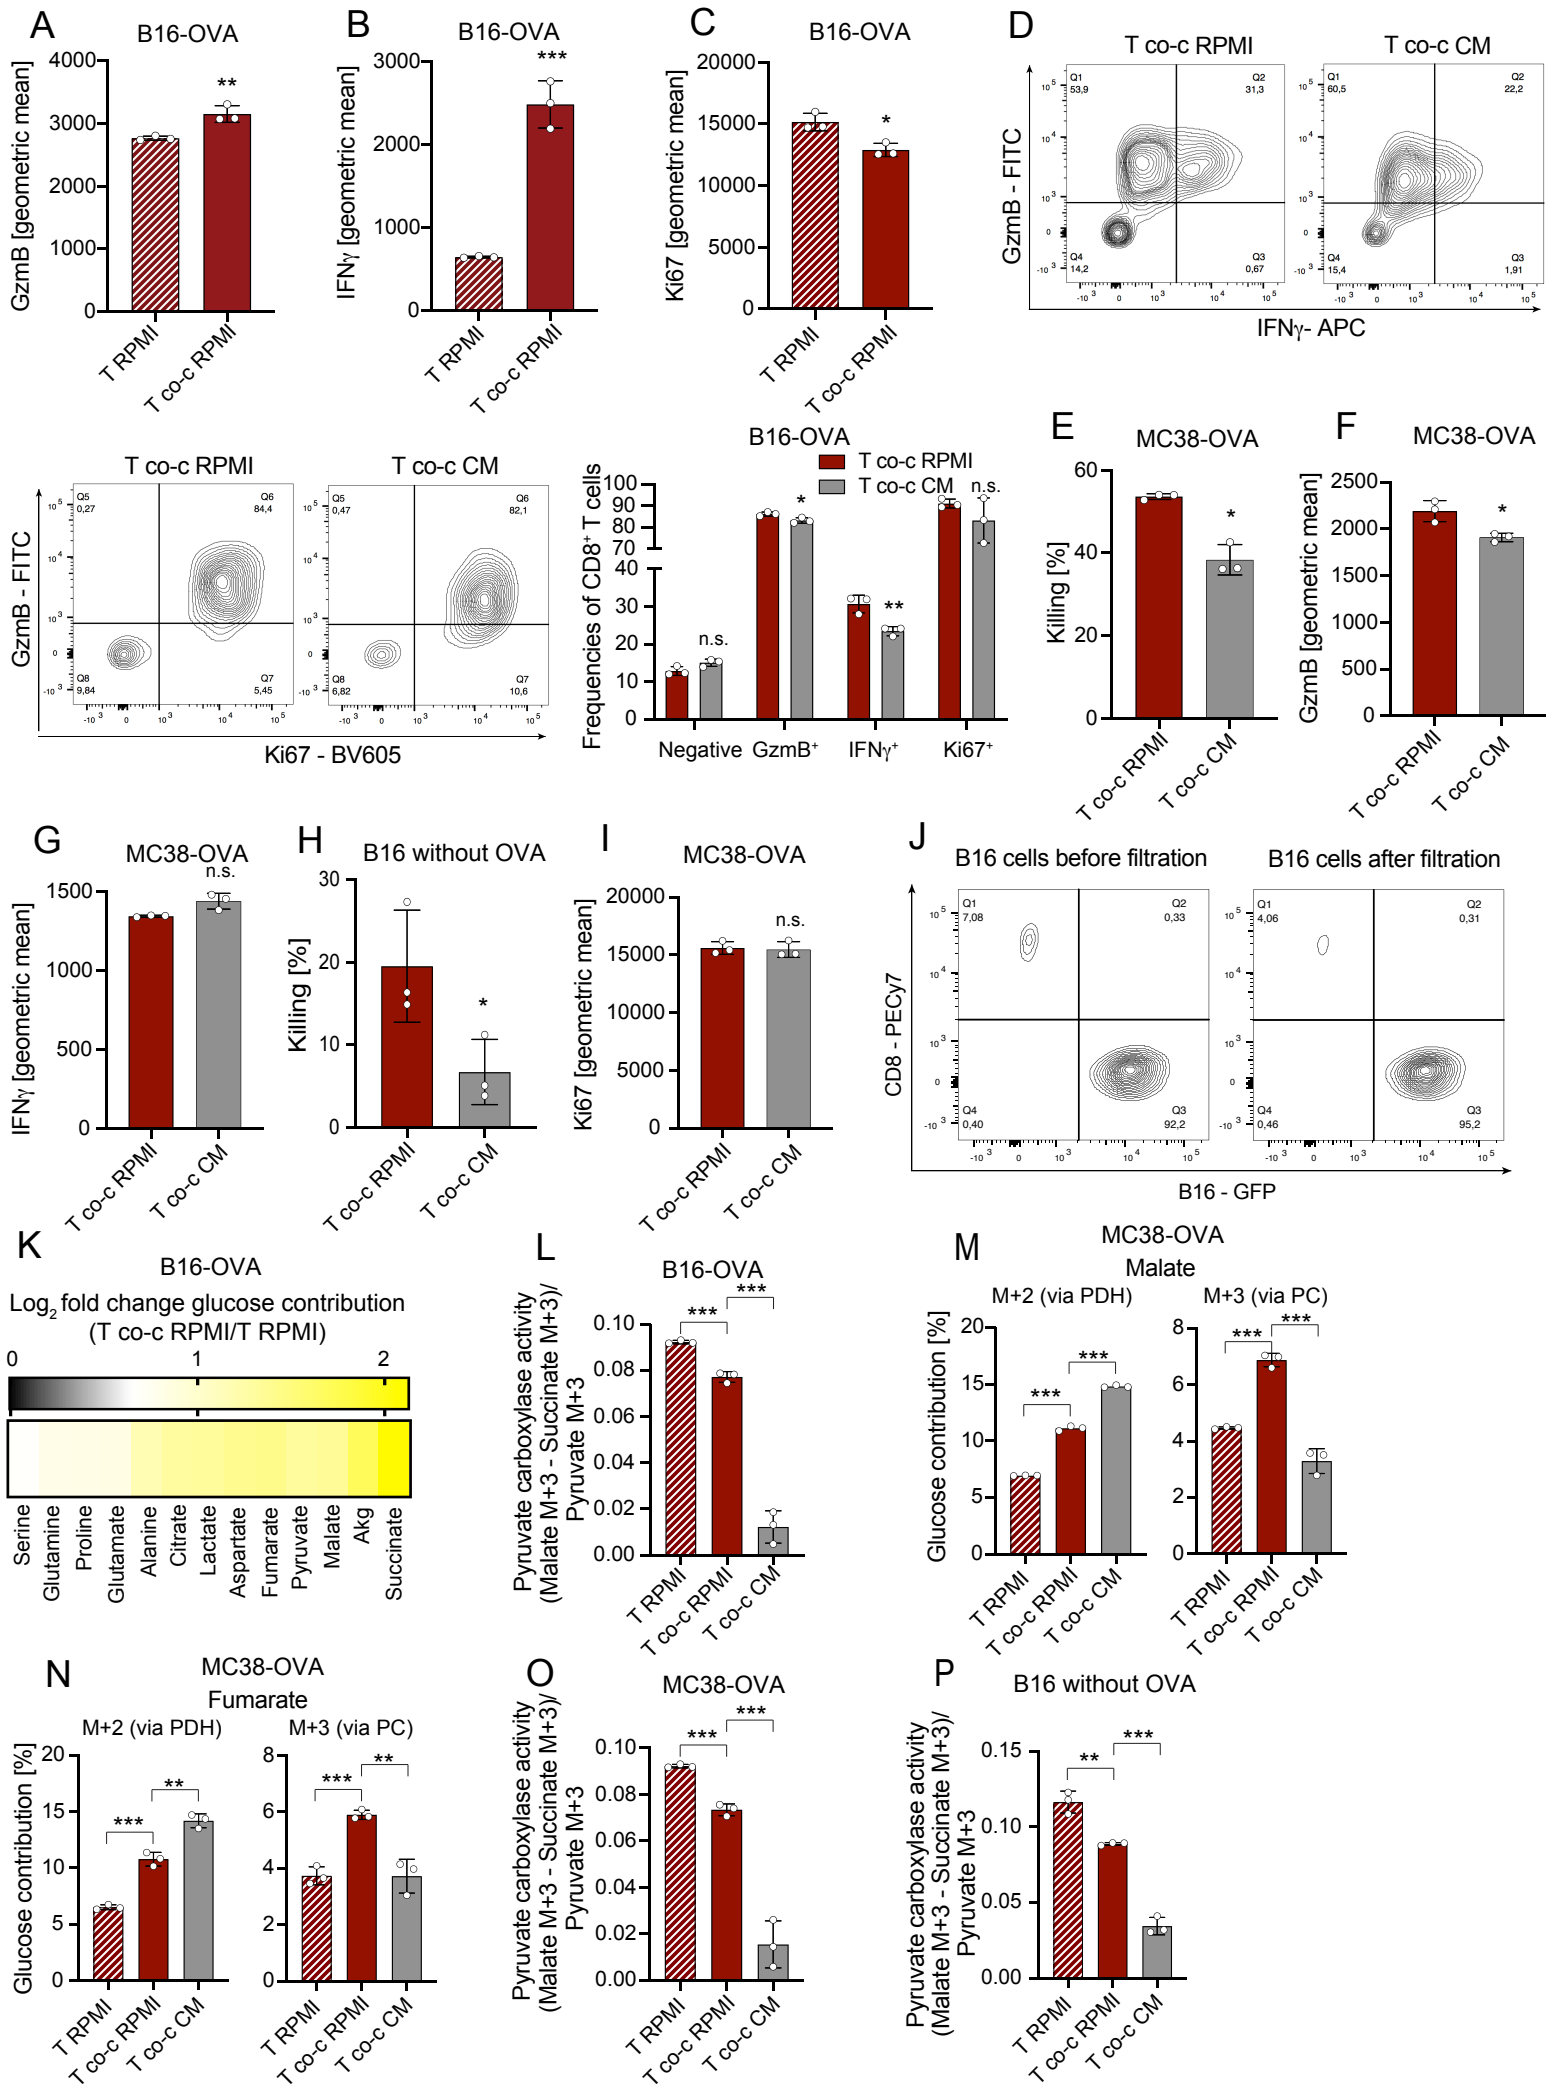

**Figure S1. CD8<sup>+</sup> T cell metabolism and cytotoxic function are impaired in tumor conditioned media, related to Figure 1.** (A-C) Geometric mean of GzmB, IFN $\gamma$ , and Ki67 expression by CD8<sup>+</sup> T cells in mono-culture (T) and in co-culture with B16-OVA tumor cells (T co-c) in RPMI. Analysis was performed after 24 hours. (D) Representative flow cytometry plots and frequencies of CD8<sup>+</sup> T cells expressing GzmB, IFN $\gamma$  and Ki67 in co-culture with B16-OVA tumor cells in RPMI and CM. Analysis was performed after 24 hours. (E-G) Killing and geometric mean of GzmB and IFN $\gamma$  expression by CD8<sup>+</sup> T cells in co-culture with MC38-OVA tumor cells in RPMI and CM. Analysis was performed after 24 hours. (H) Killing of tumor cells by CD8<sup>+</sup> T cells in co-culture with B16 cells not expressing OVA in RPMI and CM. Analysis was performed after 24 hours. (I) Geometric mean of Ki67 expression by CD8<sup>+</sup> T cells in co-culture with MC38-OVA tumor cells in RPMI and CM. Analysis was performed after 24 hours. (J) Flow cytometric measurement of B16-OVA tumor cell populations before and after filtration. (K) Heatmap representing differential <sup>13</sup>C<sub>6</sub>-glucose contribution to central carbon metabolites in CD8<sup>+</sup> T cells in co-culture with B16-OVA tumor cells compared to CD8<sup>+</sup> T cells in mono-culture. Analysis was performed after 6 hours. (L) PC activity of CD8<sup>+</sup> T cells in mono-culture (RPMI) and in co-culture with B16-OVA tumor cells in RPMI and CM. Analysis was performed after 6 hours. (M-N) Contribution of <sup>13</sup>C<sub>6</sub>-glucose to malate and fumarate M+2 (derived from PDH activity) and M+3 (derived from PC activity) in CD8<sup>+</sup> T cells in mono-culture (RPMI) and in co-culture with MC38-OVA tumor cells in RPMI and CM. Analysis was performed after 6 hours. (O) PC activity in CD8<sup>+</sup> T cells in mono-culture (RPMI) and in co-culture with MC38-OVA tumor cells in RPMI and CM. Analysis was performed after 6 hours. (P) PC activity in CD8<sup>+</sup> T cells in mono-culture (RPMI) and in co-culture with B16 tumor cells not expressing OVA in RPMI and CM. Analysis was performed after 6 hours. The number of biological replicates for each experiment was n=3. Error bars represent s.d. Two-tailed unpaired Student's T-test was performed. \*P<0.05; \*\*P<0.01; \*\*\*P<0.001.

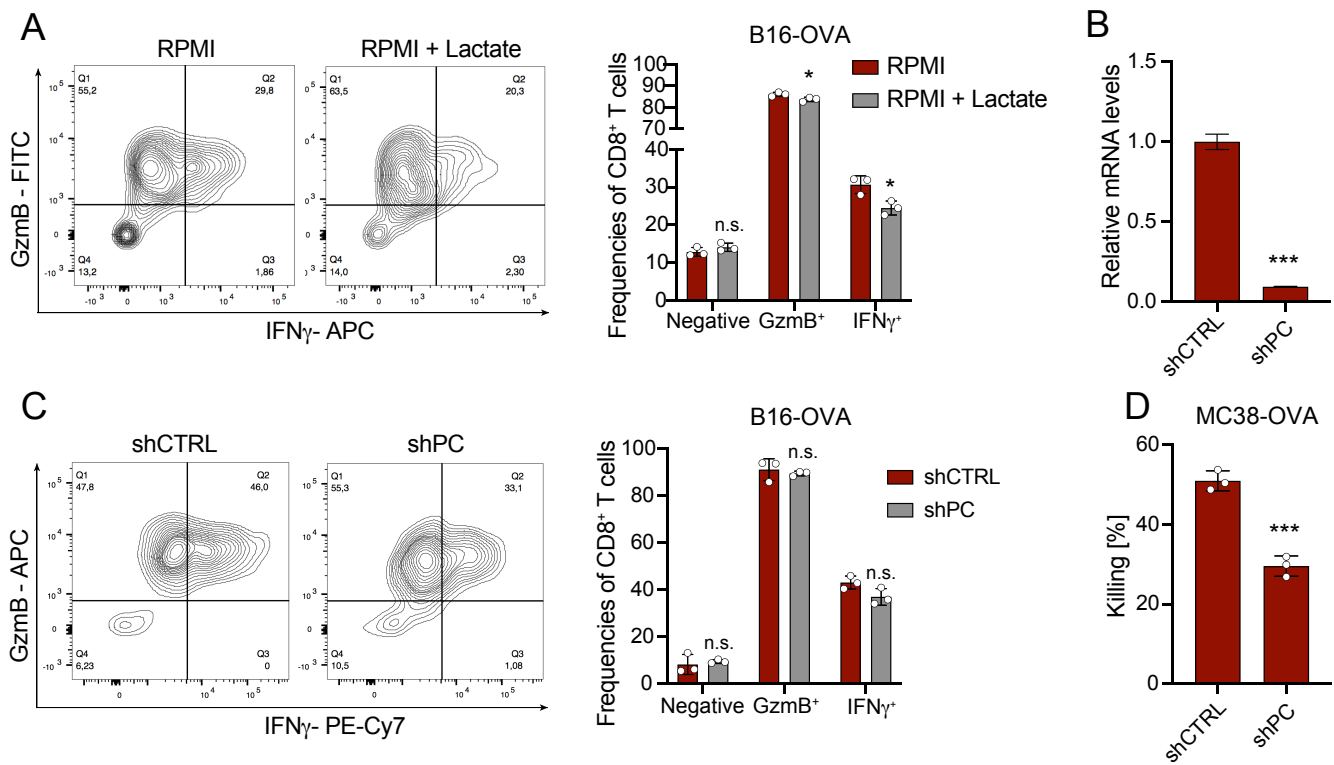

**Figure S2. Lactate addition or PC KD impairs CD8<sup>+</sup> T cell effector function, related to Figure 2 and 3.** (A) Representative flow cytometry plots and frequencies of CD8<sup>+</sup> T cells expressing GzmB and IFN $\gamma$  in co-culture with B16-OVA tumor cells in RPMI and RPMI + Lactate (10mM). Analysis was performed after 24 hours. (B) Relative mRNA levels of PC in fold change following transduction with a shRNA for PC and CTRL. (C) Representative flow cytometry plots and frequencies of CD8<sup>+</sup> T cells expressing GzmB and IFN $\gamma$  after transduction with shRNA for PC or CTRL and co-culture with B16-OVA tumor cells in RPMI. Analysis was performed after 24 hours. (D) Killing by CD8<sup>+</sup> T cells transduced with shRNA for PC or CTRL in co-culture with MC38-OVA tumor cells in RPMI. Analysis was performed after 24 hours. The number of biological replicates for each experiment was n=3. Error bars represent s.d. Two-tailed unpaired Student's T-test was performed. \*P<0.05; \*\*\*P<0.001. n.s. depicts not significant.

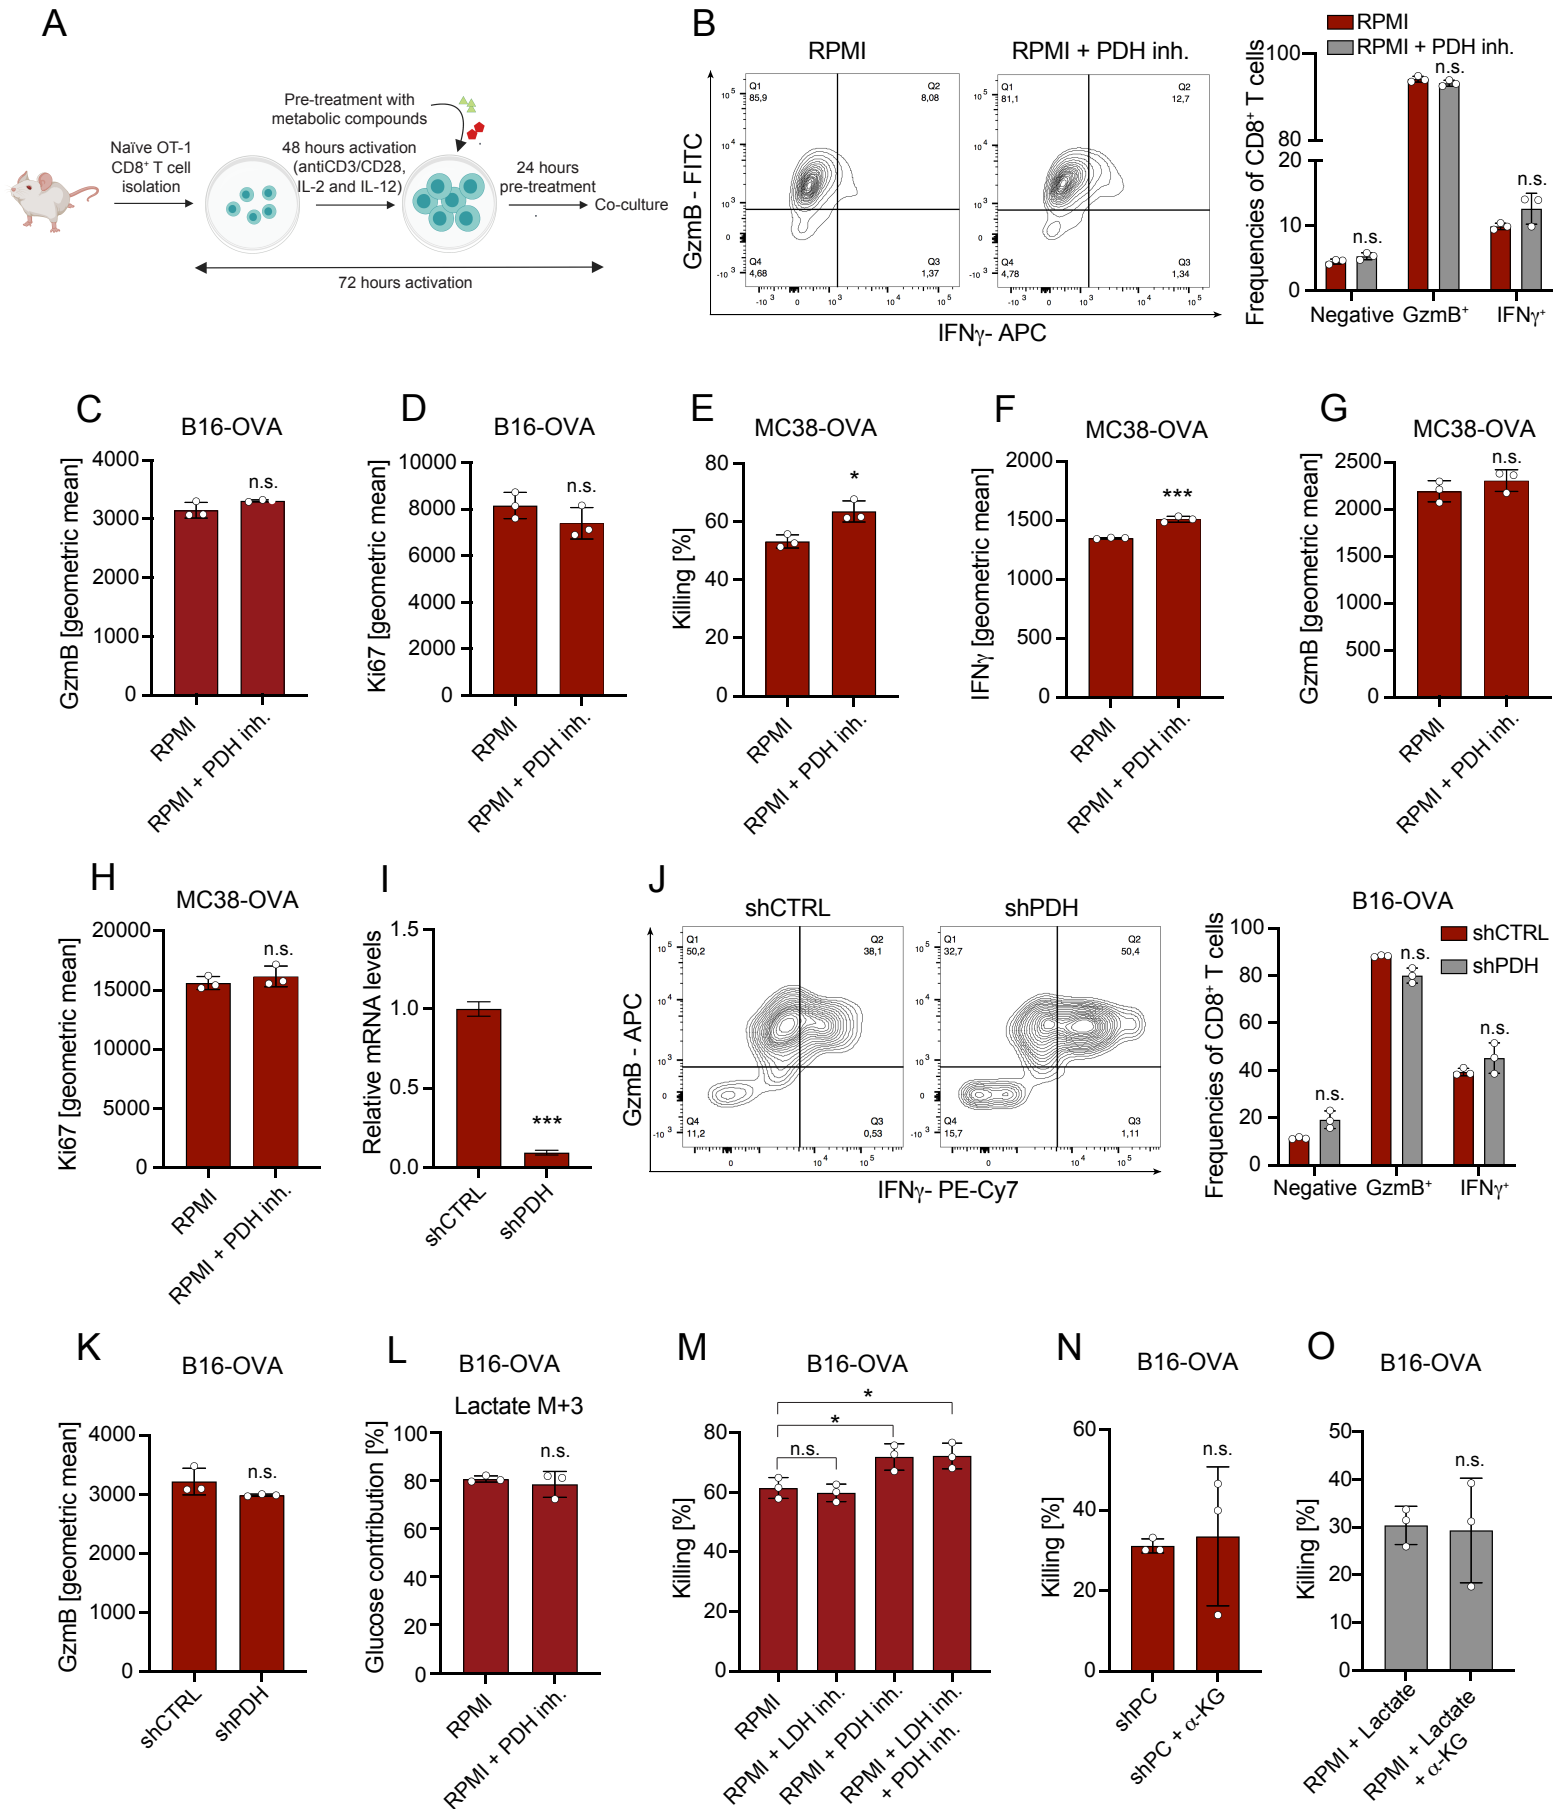

**Figure S3. PDH inhibition increases PC activity and CD8<sup>+</sup> T cell cytotoxicity without affecting LDH activity, related to Figure 3.** (A) Schematic representation of CD8<sup>+</sup> T cells pre-treatment. After 48 hours activation, CD8<sup>+</sup> T cells were pre-treated with specific drugs for additional 24 hours prior co-culture. (B) Representative flow cytometry plots and frequencies of CD8<sup>+</sup> T cells expressing GzmB and IFN $\gamma$  in co-culture with B16-OVA tumor cells following pre-treatment with or without the PDH inhibitor CPI-613 in RPMI. CD8<sup>+</sup> T cells were pre-treated with the PDH inhibitor for 24 hours (prior co-culture). Analysis was performed after 24 hours. (C-D) Geometric mean of GzmB and Ki67 expression by CD8<sup>+</sup> T cells in co-culture with B16-OVA tumor cells following pre-treatment with or without the PDH inhibitor CPI-613 in RPMI. CD8<sup>+</sup> T cells were pre-treated with the PDH inhibitor for 24 hours (prior co-culture). Analysis was performed after 24 hours. (E-H) Killing and geometric mean of GzmB, IFN $\gamma$  and Ki67 expression by CD8<sup>+</sup> T cells in co-culture with MC38-OVA tumor cells following pre-treatment with or without the PDH inhibitor CPI-613 in RPMI. CD8<sup>+</sup> T cells were pre-treated with the PDH inhibitor for 24 hours (prior co-culture). Analysis was performed after 24 hours. (I) Relative mRNA levels of PDH in fold change following transduction with a shRNA for PDH and CTRL. (J) Representative flow cytometry plots and frequencies of CD8<sup>+</sup> T cells expressing GzmB and IFN $\gamma$  following transduction with shRNA for PDH or CTRL in co-culture with B16-OVA tumor cells in RPMI. Analysis was performed after 24 hours. (K) Geometric mean of GzmB expression by CD8<sup>+</sup> T cells transduced with a shRNA for PDH or CTRL and co-cultured with B16-OVA tumor cells in RPMI. (L) Contribution of <sup>13</sup>C<sub>6</sub>-glucose to lactate M+3 in CD8<sup>+</sup> T cells in co-culture with B16-OVA tumor cells following pre-treatment with or without the PDH inhibitor CPI-613 in RPMI. CD8<sup>+</sup> T cells were pre-treated with the PDH inhibitor for 24 hours (prior co-culture). Analysis was performed after 6 hours. (M) Killing by CD8<sup>+</sup> T cells in co-culture with B16-OVA tumor cells following pre-treatment with either the LDH inhibitor sodium oxamate (10mM) or the PDH inhibitor CPI-613 or the combination of both in RPMI. CD8<sup>+</sup> T cells were pre-treated with the PDH inhibitor, LDH inhibitor or both for 24 hours (prior co-culture). Analysis was performed after 24 hours. (N) Killing by CD8<sup>+</sup> T cells transduced with shRNA for PC and in co-culture with B16-OVA tumor cells in RPMI +/- supplementation with dimethyl- $\alpha$ -ketoglutarate. Analysis was performed after 24 hours. (O) Killing by CD8<sup>+</sup> T cells in co-culture with B16-OVA tumor cells in RPMI + lactate (10mM) +/- supplementation of dimethyl- $\alpha$ -ketoglutarate. Analysis was performed after 24 hours. The number of biological replicates for each experiment was n=3. Error bars represent s.d. Two-tailed unpaired Student's T-test was performed. \*P<0.05; \*\*\*P<0.001. n.s. depicts not significant.

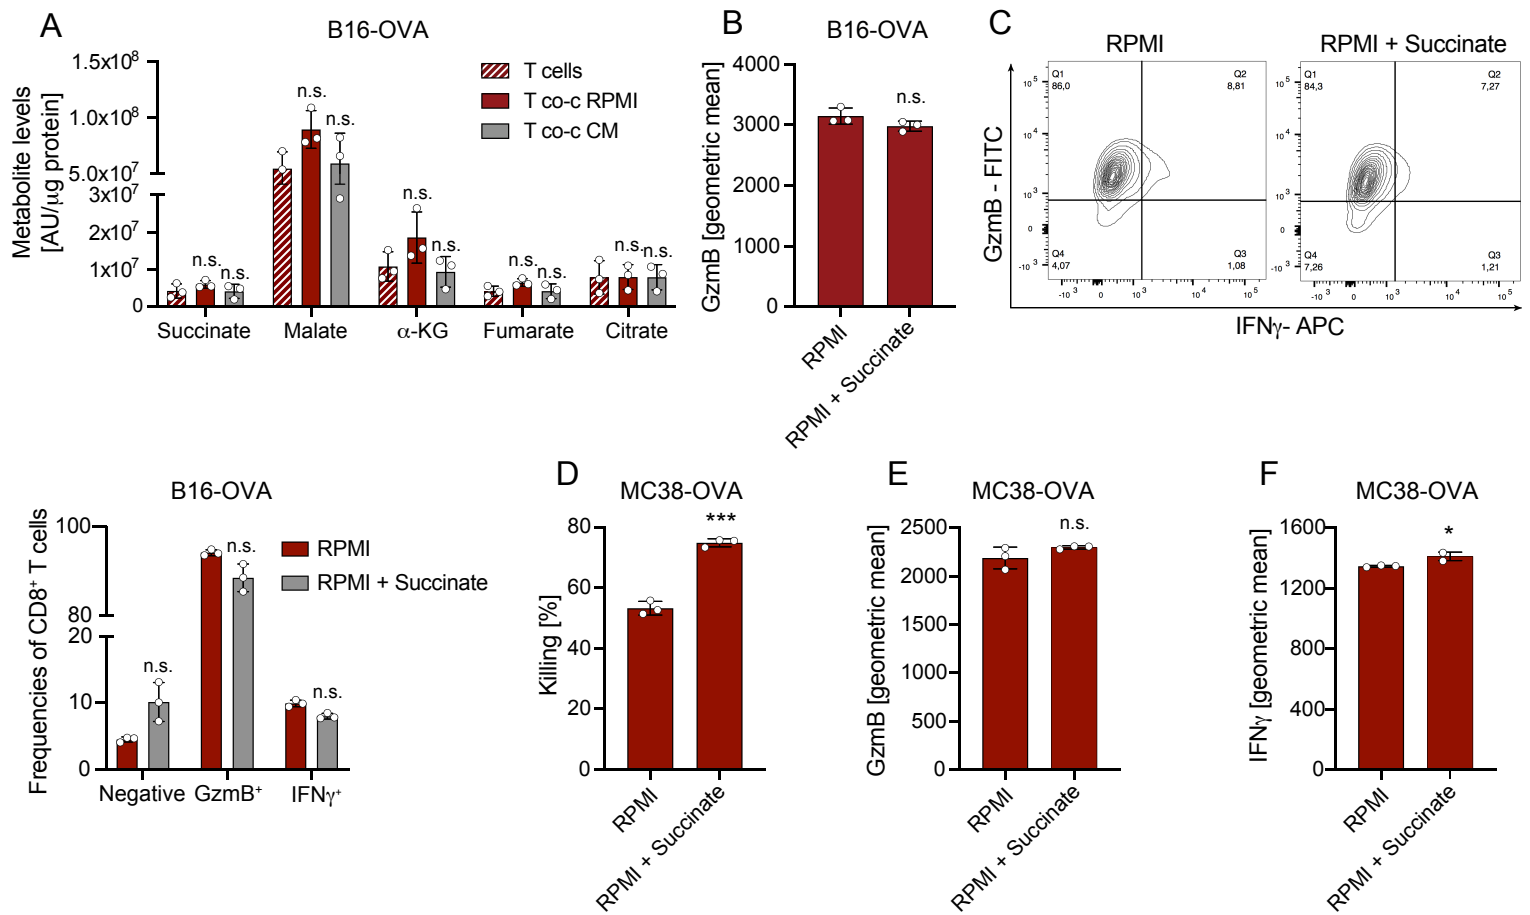

**Figure S4. Succinate supplementation increases CD8<sup>+</sup> T cell cytotoxicity, related to Figure 4.** (A) Intracellular metabolite levels in RPMI and CM from CD8<sup>+</sup> T cells in mono-culture or in co-culture with B16-OVA tumor cells. Analysis was performed after 6 hours. (B) Geometric mean of GzmB expression by CD8<sup>+</sup> T cells in co-culture with B16-OVA tumor cells and dimethyl -succinate in RPMI. Analysis was performed after 24 hours. (C) Representative flow cytometry plots and frequencies of CD8<sup>+</sup> T cells expressing GzmB and IFN $\gamma$  in co-culture with B16-OVA tumor cells and dimethyl-succinate in RPMI. Analysis was performed after 24 hours. (D-F) Killing and geometric mean of GzmB and IFN $\gamma$  expression by CD8<sup>+</sup> T cells in co-culture with MC38-OVA tumor cells and dimethyl-succinate in RPMI. Analysis was performed after 24 hours. The number of biological replicates for each experiment was n=3. Error bars represent s.d. Two-tailed unpaired Student's T-test was performed. \*P<0.05; \*\*\*P<0.001. n.s. depicts not significant.

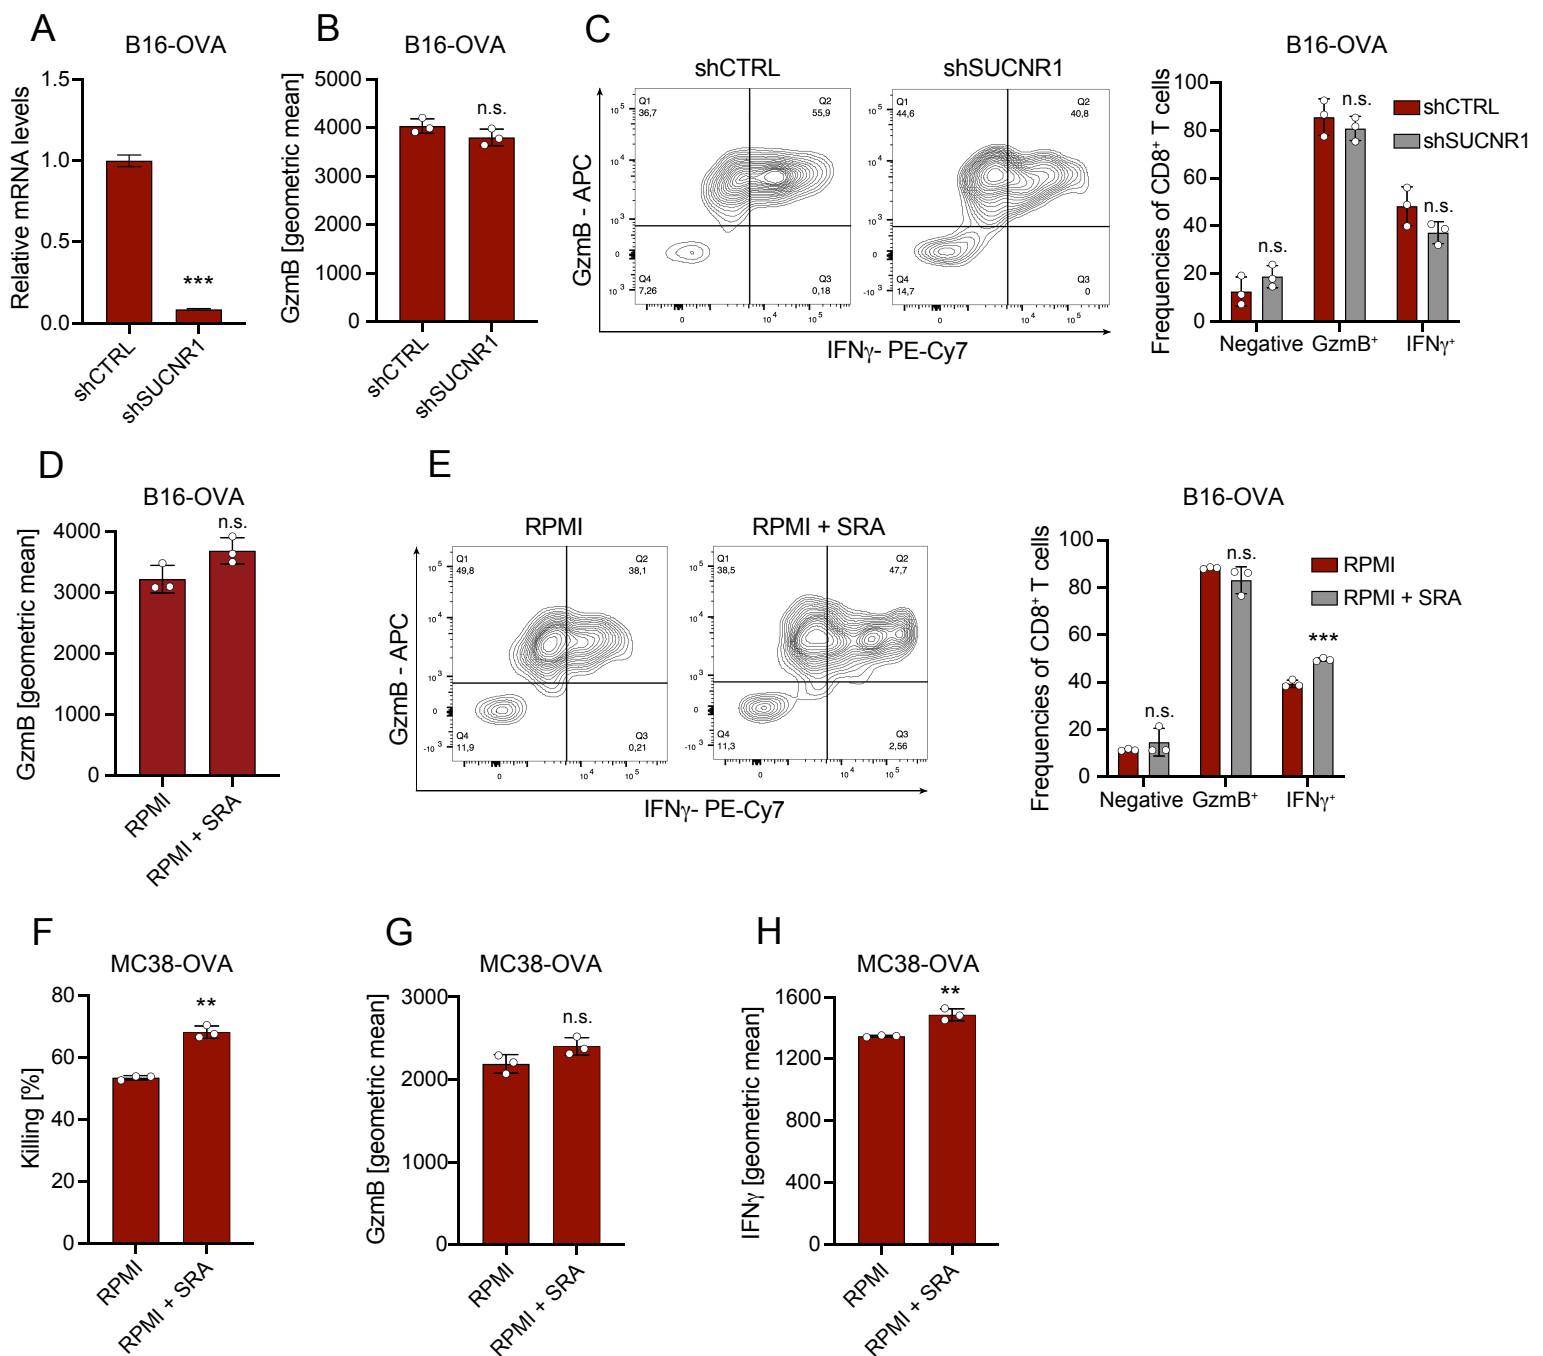

**Figure S5. A succinate receptor agonist (SRA) increases CD8<sup>+</sup> T cell cytotoxicity, related to Figure 5. (A)** Relative mRNA levels of SUCNR1 in fold change transduced with a shRNA for SUCNR1 and CTRL. **(B)** Geometric mean of Gzmb expression by CD8<sup>+</sup> T cells transduced with a shRNA for SUCNR1 or CTRL and co-cultured with B16-OVA tumor cells in RPMI. Analysis was performed after 24 hours. **(C)** Representative flow cytometry plots and frequencies of CD8<sup>+</sup> T cells expressing Gzmb and IFN $\gamma$  after transduction with shRNA for SUCNR1 or CTRL and co-culture with B16-OVA tumor cells in RPMI. Analysis was performed after 24 hours. **(D)** Geometric mean of Gzmb expression by CD8<sup>+</sup> T cells in co-culture with B16-OVA tumor cells following pre-treatment with the SRA cis-epoxysuccinic acid in RPMI. CD8<sup>+</sup> T cells were pre-treated with SRA for 24 hours (prior co-culture). Analysis was performed after 24 hours. **(E)** Representative flow cytometry plots and frequencies of CD8<sup>+</sup> T cells expressing Gzmb and IFN $\gamma$  in co-culture with B16-OVA tumor cells following pre-treatment with the SRA cis-epoxysuccinic acid in RPMI. CD8<sup>+</sup> T cells were pre-treated with SRA for 24 hours (prior co-culture). Analysis was performed after 24 hours. **(F-H)** Killing and geometric mean of Gzmb and IFN $\gamma$  expression by CD8<sup>+</sup> T cells in co-culture with MC38-OVA tumor cells following pre-treatment with the SRA cis-epoxysuccinic acid in RPMI. CD8<sup>+</sup> T cells were pre-treated with SRA for 24 hours (prior co-culture). Analysis was performed after 24 hours. The number of biological replicates for each experiment was n=3. Error bars represent s.d. Two-tailed unpaired Student's T-test was performed. \*\*P<0.01; \*\*\*P<0.001. n.s. depicts not significant.

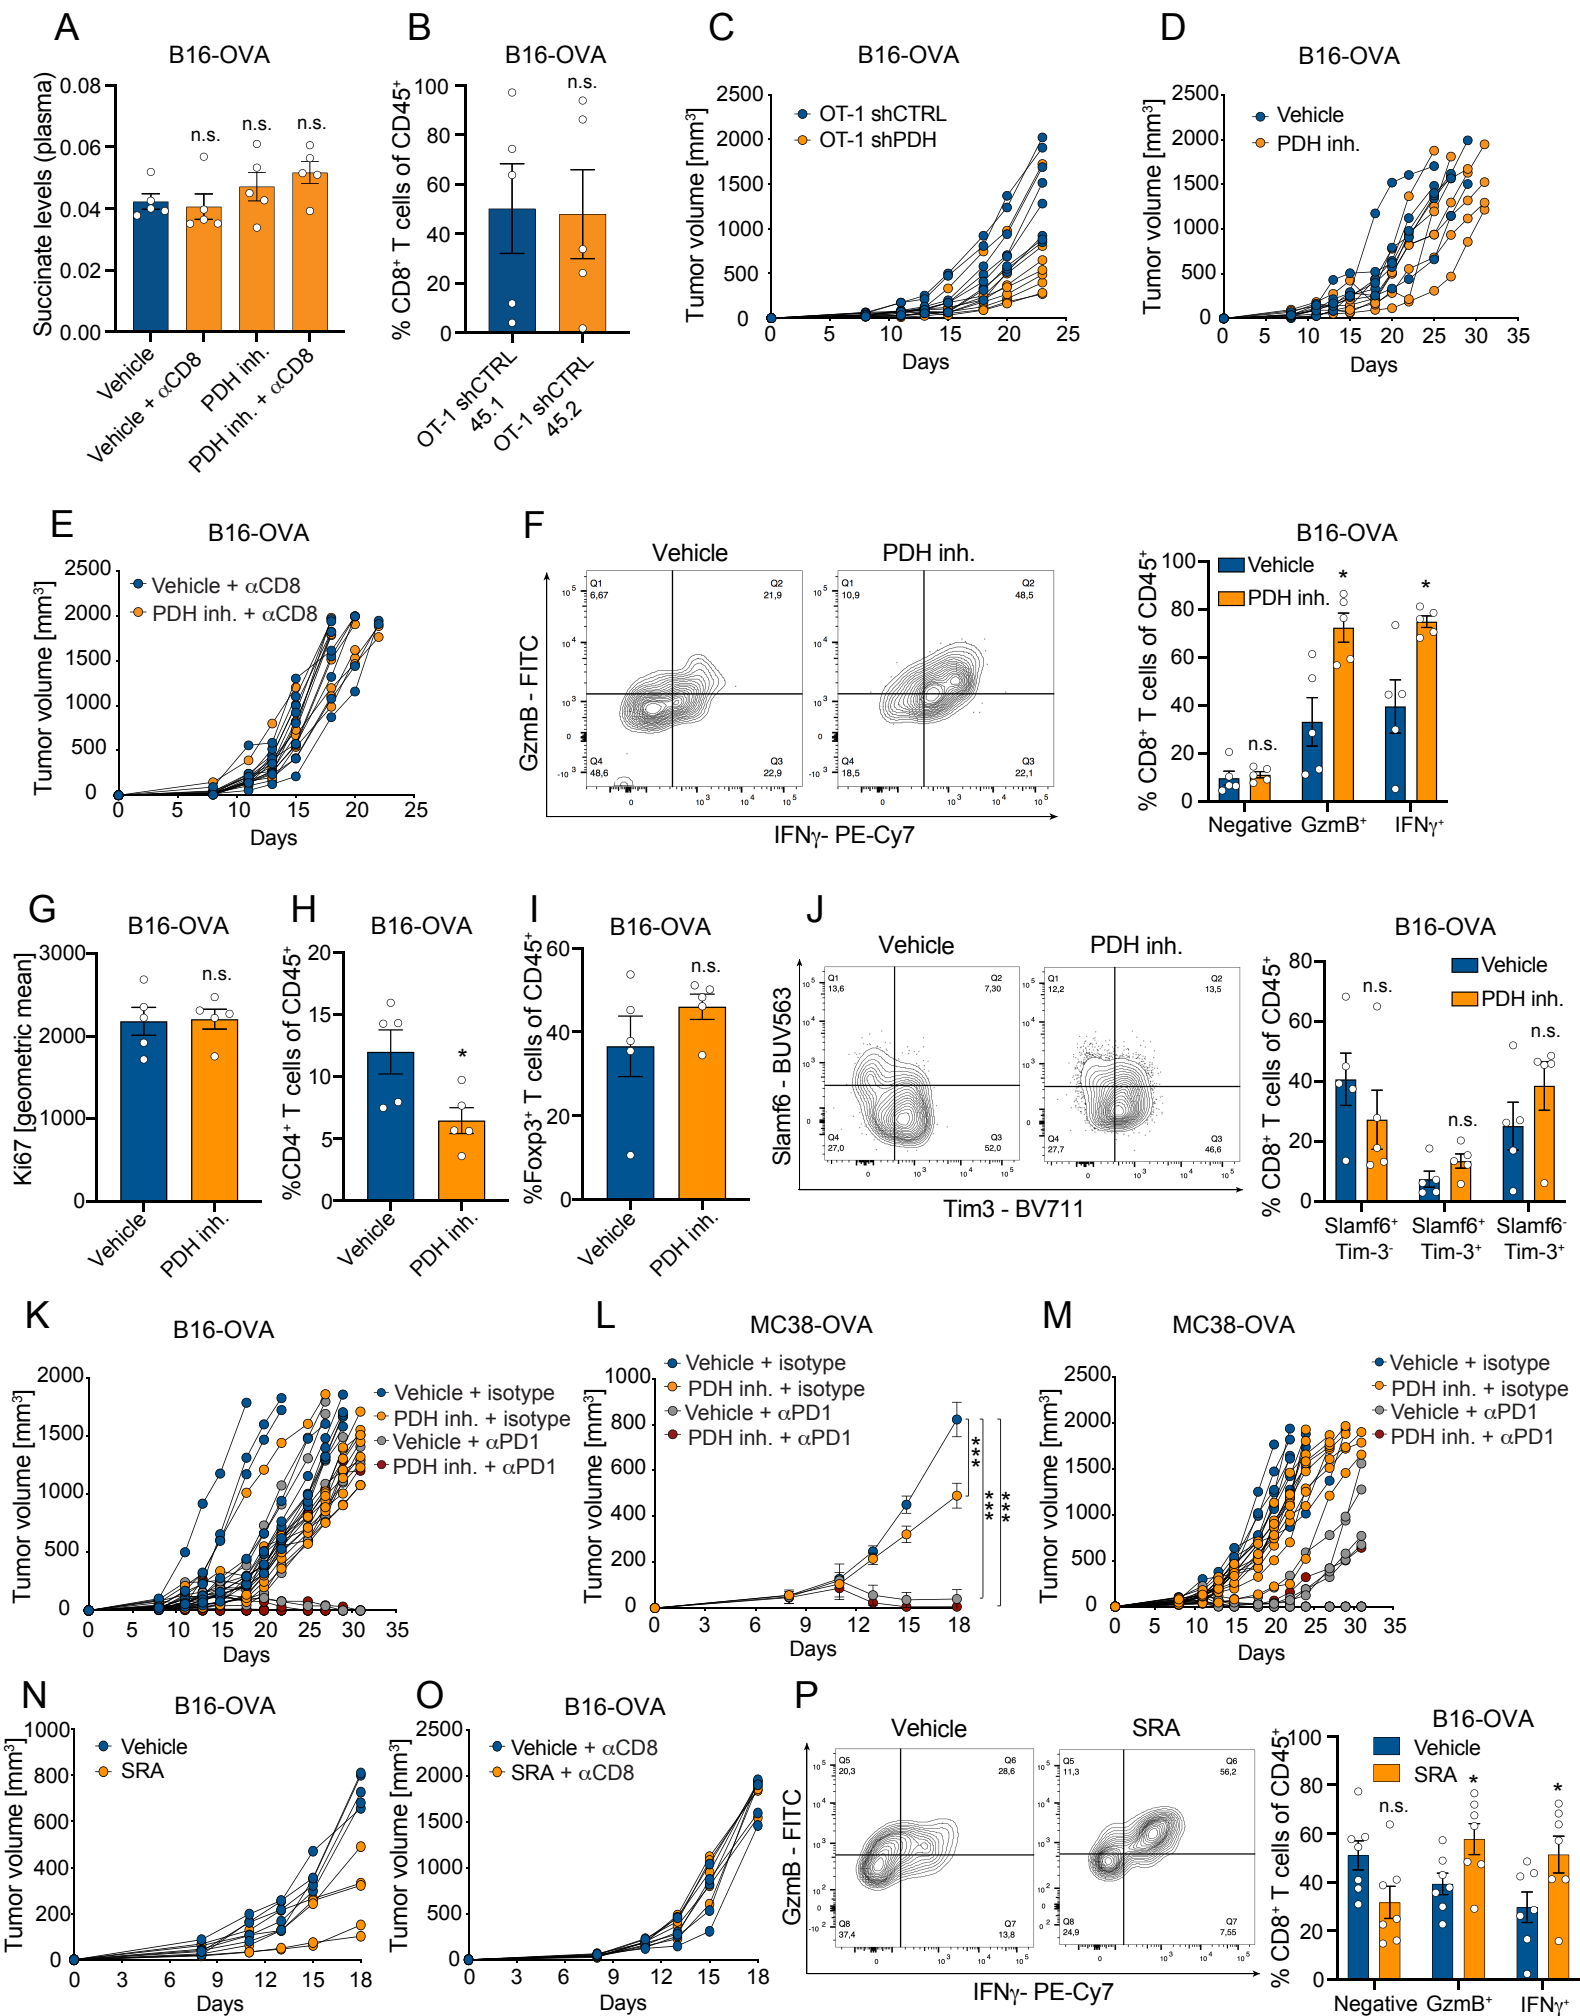



**Figure S6. PDH inhibition promotes tumor regression, also in a MC38 syngeneic mouse model, related to Figure 6.** (A) Relative succinate levels in the plasma of B16 syngeneic mice. Analysis was performed at day 18. n=5. Two-tailed unpaired Student's T-test was performed. (B) % of OT-1 CD8<sup>+</sup> T cells of CD45<sup>+</sup> with the congenic markers 45.1 and 45.2 transduced with a shRNA for CTRL in B16 tumors. OT-1 shCTRL 45.1 and OT-1 shCTRL 45.2 were adoptively transferred using a ratio 1:1, one day prior B16-OVA tumor implantation. Analysis was performed at day 16. (C) Individual tumor growth curves showing tumor volume in mice upon adoptive transfer of OT-1 CD8<sup>+</sup> T cells transduced with a shRNA for PDH and CTRL. Adoptive transfer was performed 9 days after B16-OVA tumor implantation (relative to Figure 6D). (D) Individual tumor growth curves showing tumor volume in mice treated with either vehicle or the PDH inhibitor CPI-613 (relative to Figure 6E). (E) Individual tumor growth curves showing tumor volume in mice treated with either vehicle or the PDH inhibitor CPI-613 with antibodies to specifically deplete CD8<sup>+</sup> T cells (relative to Figure 6F). (F) Representative flow cytometry plots and % of CD8<sup>+</sup> T cells expressing GzmB and IFN $\gamma$  from mice implanted with B16 cells and treated with either vehicle or the PDH inhibitor CPI-613. Analysis was performed at day 18. Two-tailed unpaired Student's t-test was performed. (G) Geometric mean of Ki67 expression in CD8<sup>+</sup> T cells from mice implanted with B16 tumor cells and treated with either vehicle or the PDH inhibitor CPI-613. n=5. Analysis was performed at day 18. Two-tailed unpaired Student's t-test was performed. (H) % of CD4<sup>+</sup> T cells of CD45<sup>+</sup> in B16 tumors from mice treated with either vehicle or the PDH inhibitor CPI-613. Analysis was performed at day 18. Two-tailed unpaired Student's t-test was performed. (I) % of Foxp3<sup>+</sup> T cells of CD45<sup>+</sup> in B16 tumors from mice treated with either vehicle or the PDH inhibitor CPI-613. Analysis was performed at day 18. Two-tailed unpaired Student's t-test was performed. (J) Representative flow cytometry plots and % of CD8<sup>+</sup> T cells of CD45<sup>+</sup> expressing Slamf6 and Tim-3 from mice implanted with B16 cells and treated with either vehicle or the PDH inhibitor CPI-613. Analysis was performed at day 18. Two-tailed unpaired Student's t-test was performed. (K) Individual tumor growth curves showing tumor volume in mice treated with either vehicle or the PDH inhibitor CPI-613 and isotype control or  $\alpha$ PD-1 (Relative to Figure 6I). (L) Tumor volume overtime of mice implanted with MC38-OVA cells and treated with either vehicle or the PDH inhibitor CPI-613 with isotype control or  $\alpha$ PD-1. Vehicle + isotype: n=9; PDH inh. + isotype: n=10; Vehicle +  $\alpha$ PD1: n=5; PDH inh. +  $\alpha$ PD1: n=5. A two-way Anova with Sidak's multiple comparison test was performed. (M) Individual tumor growth curves of mice implanted with MC38-OVA cells and treated with either vehicle or the PDH inhibitor CPI-613 with isotype control or  $\alpha$ PD-1 (Relative to Supplementary Figure 7L). (N) Individual tumor growth curves of mice treated with either vehicle or the SRA cis-epoxysuccinic acid (Relative to Figure 6K). (O) Individual tumor growth curves of mice treated with either vehicle or the SRA cis-epoxysuccinic acid with antibodies to specifically deplete CD8<sup>+</sup> T cells (relative to Figure 6L). (P) Representative flow cytometry plots and % of CD8<sup>+</sup> T cells of CD45<sup>+</sup> expressing GzmB and IFN $\gamma$  from mice implanted with B16 cells and treated with either vehicle or the SRA cis-epoxysuccinic acid. Analysis was performed at day 18. Two-tailed unpaired Student's t-test was performed. Error bars represent s.e.m. \*P<0.05; \*\*\*P<0.001. n.s. depicts not significant.
